# Supplementary material for: Activation of Adaptive and Innate Immune Cells via Localized IL2 Cytokine Factories Eradicates Mesothelioma Tumors
Source: PubMed Central journal article supplement — Clin Cancer Res. 2022 Sep 12;28(23):5121–35. doi: 10.1158/1078-0432.CCR-22-1493 (PMC9713361; doi:10.1158/1078-0432.ccr-22-1493), 2022-09-12
Supplement: ccr-22-1493_figure_s1_suppfs1.pdf [file ccr-22-1493_figure_s1_suppfs1.pdf]

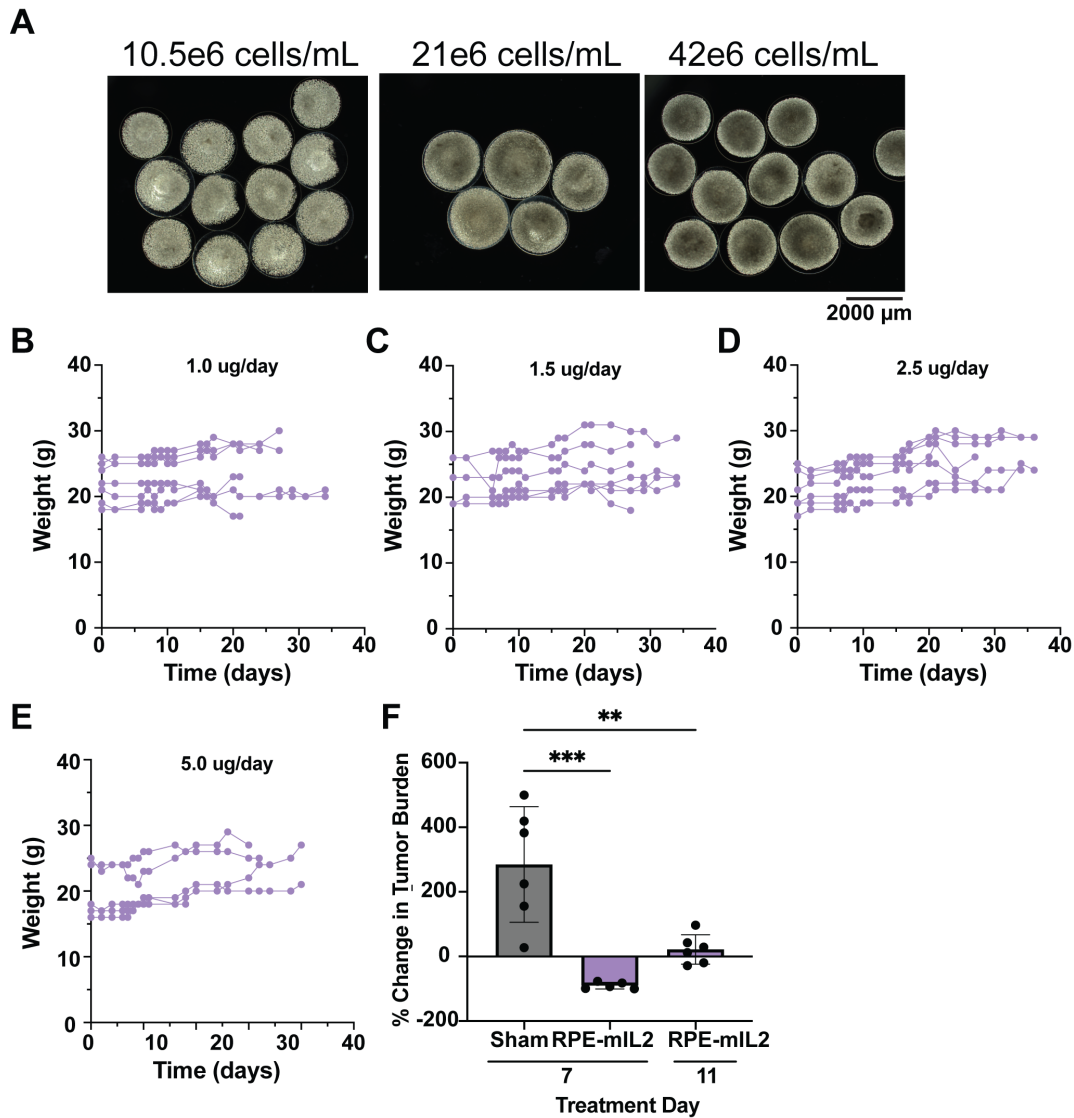

**Supplemental Figure 1. Dose dependent anti-tumor effects of RPE-mIL2 administration.** **A**, Darkfield images of RPE-mIL2 cells encapsulated at 10.5, 21, and 42e6 cells/mL of SLG20 alginate. Images acquired at 2X magnification; scale bar is 2000  $\mu$ m. **B-E**, Plots tracking the weight of individual mice in each of the RPE-mIL2 treatment groups over the course of treatment. **F**, Percent change in tumor burden for sham and RPE-mIL2 groups treated at 7 days compared to mice treated at day 11.
