# Supplementary material for: Activation of Adaptive and Innate Immune Cells via Localized IL2 Cytokine Factories Eradicates Mesothelioma Tumors
Source: PubMed Central journal article supplement — Clin Cancer Res. 2022 Sep 12;28(23):5121–35. doi: 10.1158/1078-0432.CCR-22-1493 (PMC9713361; doi:10.1158/1078-0432.ccr-22-1493), 2022-09-12
Supplement: ccr-22-1493_figure_s2_suppfs2.pdf [file ccr-22-1493_figure_s2_suppfs2.pdf]

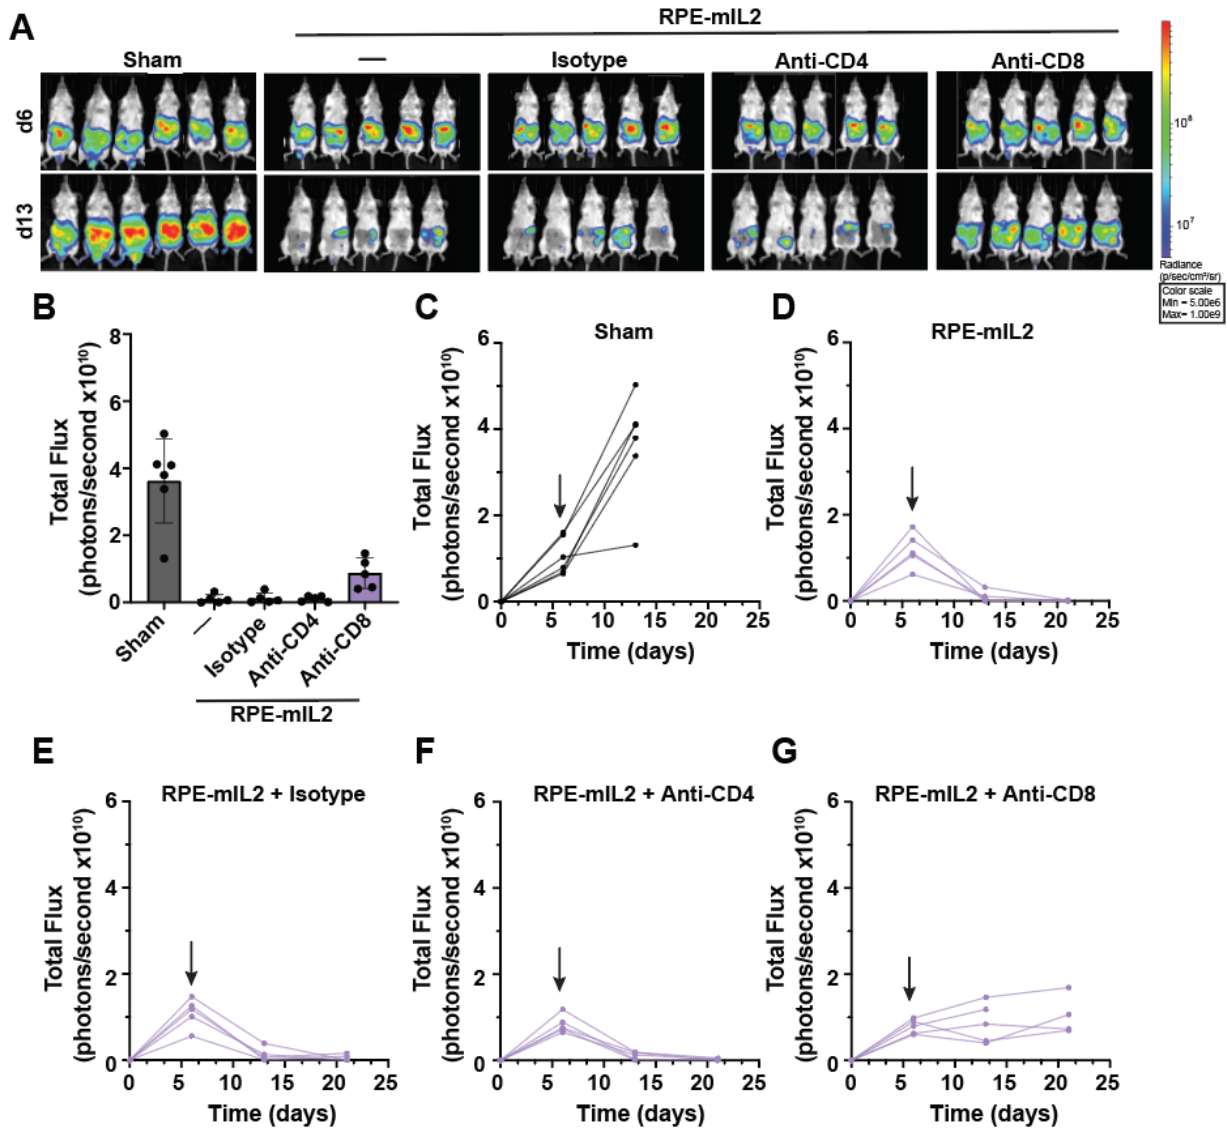

**Supplemental Figure 2. CD8+ T cells are needed for a robust anti-tumor response in mice with MPM tumors.** **A**, Luminescent images tracking AB1-Fluc tumor burden acquired 6 days and 13 days post tumor injection. Mice were injected intraperitoneally with anti-CD8 and anti-CD4, or isotype control antibodies 2 days prior to, on, and 2 days following tumor injection. **B**, Quantification of luminescent images represented by total flux (photons per second) for each treatment group (n=5-6). **C-G**, Quantification of tumor burden for each treatment group (n=5-6) represented by total flux (photons/s) plotted over time. Black arrows indicate the day of treatment administration.
