# Supplementary material for: Activation of Adaptive and Innate Immune Cells via Localized IL2 Cytokine Factories Eradicates Mesothelioma Tumors
Source: PubMed Central journal article supplement — Clin Cancer Res. 2022 Sep 12;28(23):5121–35. doi: 10.1158/1078-0432.CCR-22-1493 (PMC9713361; doi:10.1158/1078-0432.ccr-22-1493), 2022-09-12
Supplement: ccr-22-1493_figure_s3_suppfs3.pdf [file ccr-22-1493_figure_s3_suppfs3.pdf]

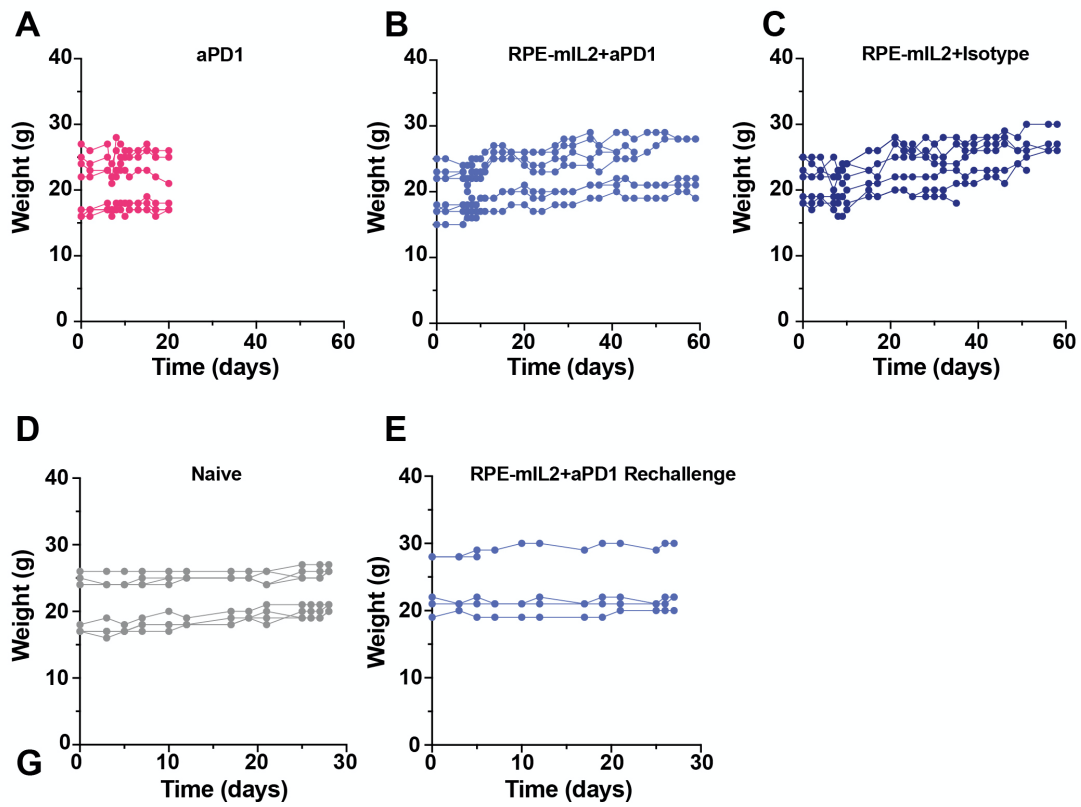

**Supplemental Figure 3. Combination treatment did not cause significant deviations in body weight.** A-E, Plots tracking the weight of individual mice in each of the treatment groups over the course of treatment.
