# Supplementary material for: Activation of Adaptive and Innate Immune Cells via Localized IL2 Cytokine Factories Eradicates Mesothelioma Tumors
Source: PubMed Central journal article supplement — Clin Cancer Res. 2022 Sep 12;28(23):5121–35. doi: 10.1158/1078-0432.CCR-22-1493 (PMC9713361; doi:10.1158/1078-0432.ccr-22-1493), 2022-09-12
Supplement: ccr-22-1493_figure_s4_suppfs4.pdf [file ccr-22-1493_figure_s4_suppfs4.pdf]

## Orthotopic model of AB1 malignant mesothelioma

**A**

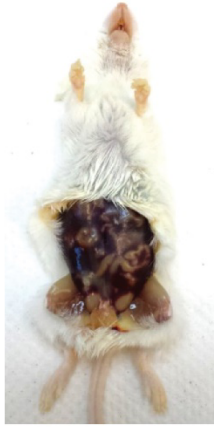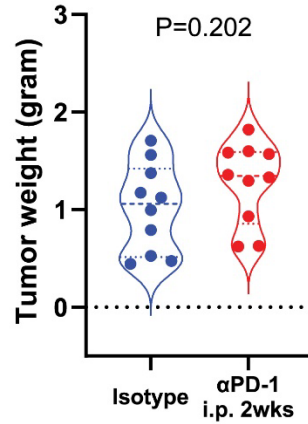

**B**

**IL-2 signaling pathway**

|         |        |
|---------|--------|
| CSNK2A1 | JUN    |
| ELK1    | LCK    |
| FOS     | MAP2K1 |
| GRB2    | MAPK3  |
| HRAS    | MAPK8  |
| IL2     | RAF1   |
| IL2RA   | SHC1   |
| IL2RB   | SOS1   |
| IL2RG   | STAT5A |
| JAK1    | STAT5B |
| JAK3    | SYK    |

**AB1 mesothelioma treated with αPD-1 + αCTLA-4**

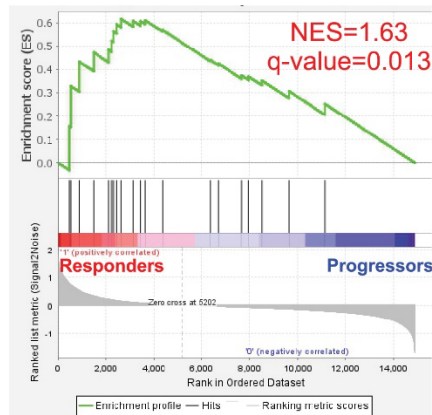

GSE117358

**Supplemental Figure 4. aPD1 therapy is not effective as a single agent for MPM tumors. A,** Orthotopic AB1 malignant mesothelioma was resistant to aPD1 treatment. **B,** gene set enrichment analysis of a publicly available data set (accession no. GSE117358) revealed the IL-2 signaling pathway is associated with immunotherapy response.
