# Supplementary material for: Activation of Adaptive and Innate Immune Cells via Localized IL2 Cytokine Factories Eradicates Mesothelioma Tumors
Source: PubMed Central journal article supplement — Clin Cancer Res. 2022 Sep 12;28(23):5121–35. doi: 10.1158/1078-0432.CCR-22-1493 (PMC9713361; doi:10.1158/1078-0432.ccr-22-1493), 2022-09-12
Supplement: ccr-22-1493_figure_s5_suppfs5.pdf [file ccr-22-1493_figure_s5_suppfs5.pdf]

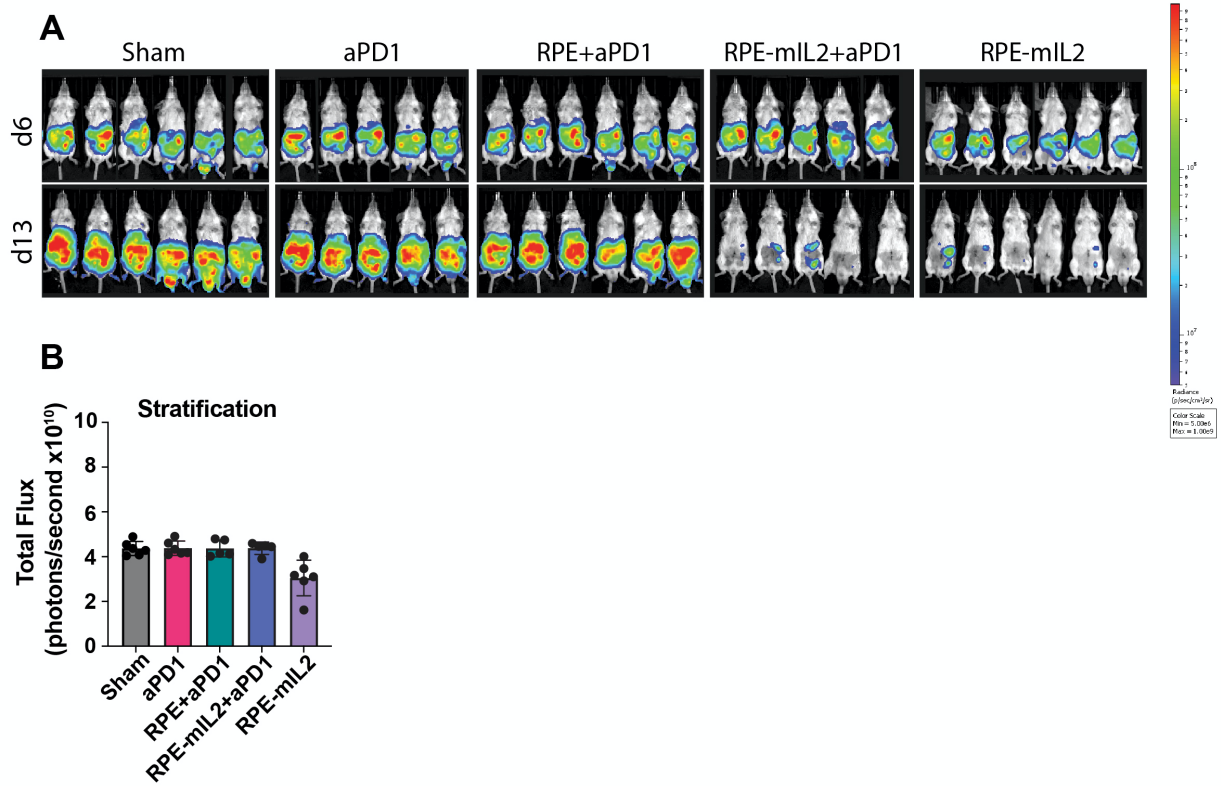

**Supplemental Figure 5. Combination of RPE-miL2 and aPD1 checkpoint therapy elicit MPM tumor eradication.** **A**, Luminescent images tracking AB1-Fluc tumor burden acquired 6 days and 13 days post tumor injection. **B**, Quantification of luminescent images represented by total flux (photons per second) at day 6 post tumor injection, prior to treatment.
