# Supplementary material for: Activation of Adaptive and Innate Immune Cells via Localized IL2 Cytokine Factories Eradicates Mesothelioma Tumors
Source: PubMed Central journal article supplement — Clin Cancer Res. 2022 Sep 12;28(23):5121–35. doi: 10.1158/1078-0432.CCR-22-1493 (PMC9713361; doi:10.1158/1078-0432.ccr-22-1493), 2022-09-12
Supplement: ccr-22-1493_figure_s6_suppfs6.pdf [file ccr-22-1493_figure_s6_suppfs6.pdf]

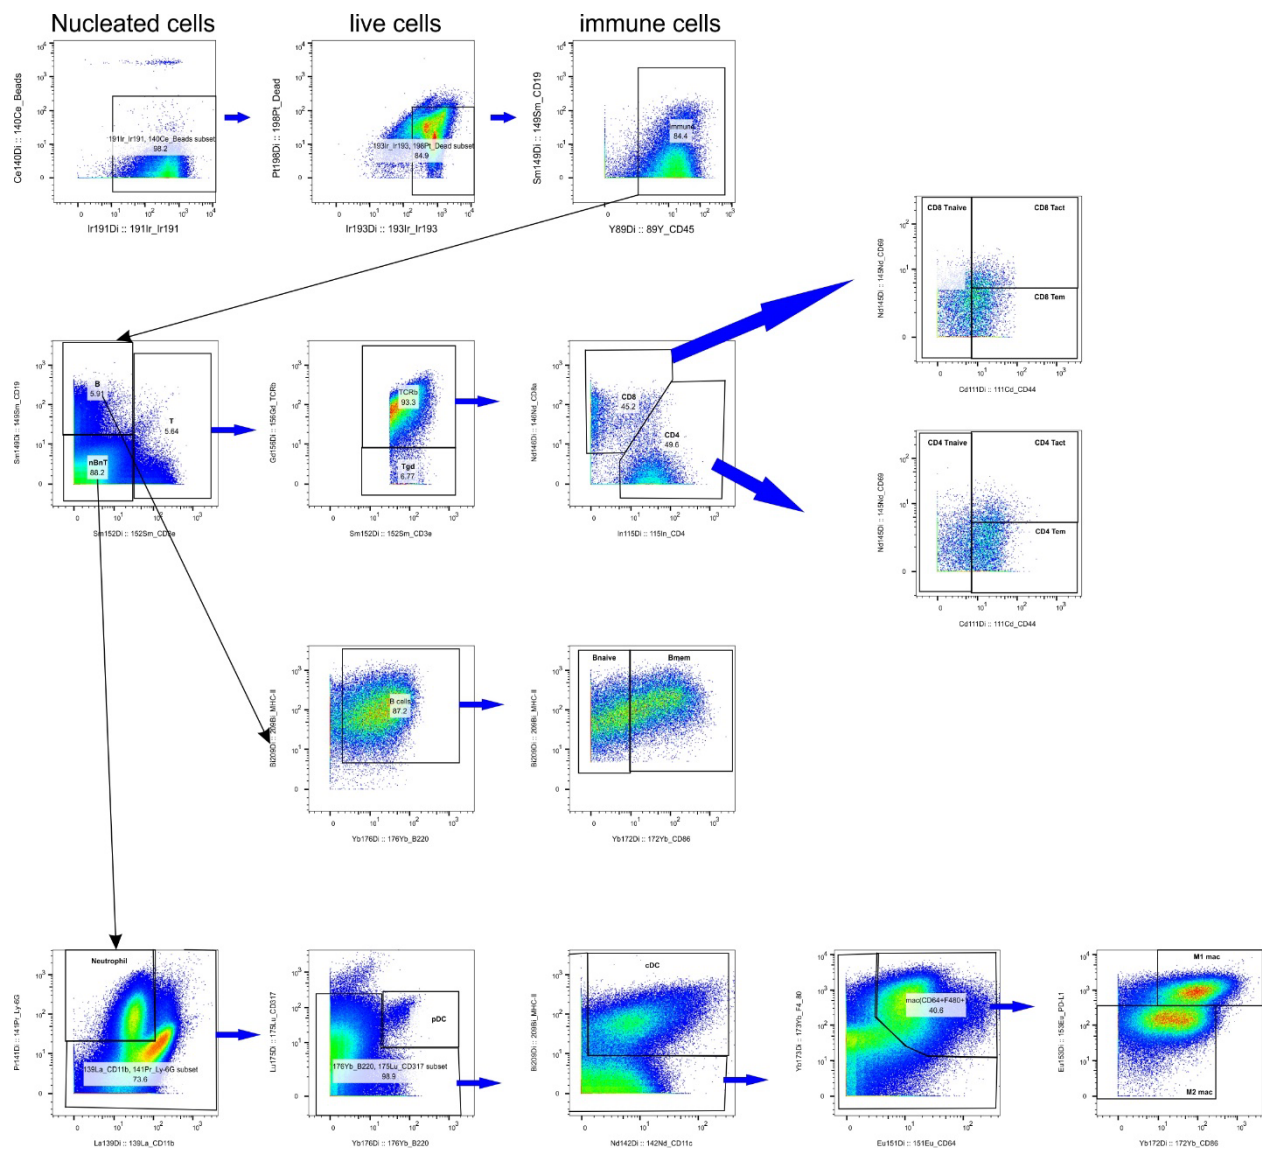

**Supplemental Figure 6. Gating strategies of CyTOF data.** Fourteen cellular phenotypes were manually defined by a panel of 43 antibodies (Supplementary Table 1): memory B cells (CD45+CD19+B220+CD86+), naive B cells (CD45+CD19+B220+CD86-), active CD4 T cells (CD45+CD3+TCR- $\beta$ +CD4+CD44+CD69+CD62L-), effector memory CD4 T cells (CD45+CD3+TCR- $\beta$ +CD4+CD44+CD69-CD62L-), naive CD4 T cells (CD45+CD3+TCR- $\beta$ +CD4+CD44-CD69-CD62L+), active CD8 T cells (CD45+CD3+TCR- $\beta$ +CD8+CD44+CD69+CD62L-), effector memory CD8 T cells (CD45+CD3+TCR- $\beta$ +CD8+CD44+CD69-CD62L-), naive CD8 T cells (CD45+CD3+TCR- $\beta$ +CD8+CD44-CD69-CD62L+),  $\gamma\delta$ T cells (CD45+CD3+TCR- $\beta$ -), M1-like macrophages (CD45+CD3-CD64+F4/80+CD86+PD-L1+), M2-like macrophages (CD45+CD3-CD64+F4/80+CD86-PD-L1-), plasmacytoid dendritic cells (CD45+CD3-CD19-CD11c+B220+CD317+), conventional DC (CD45+CD3-CD19-CD11c+B220-MHCII+), neutrophils (CD45+CD3-CD19-CD11b+Ly-6G+).
