# Supplementary material for: Activation of Adaptive and Innate Immune Cells via Localized IL2 Cytokine Factories Eradicates Mesothelioma Tumors
Source: PubMed Central journal article supplement — Clin Cancer Res. 2022 Sep 12;28(23):5121–35. doi: 10.1158/1078-0432.CCR-22-1493 (PMC9713361; doi:10.1158/1078-0432.ccr-22-1493), 2022-09-12
Supplement: ccr-22-1493_figure_s7_suppfs7.pdf [file ccr-22-1493_figure_s7_suppfs7.pdf]

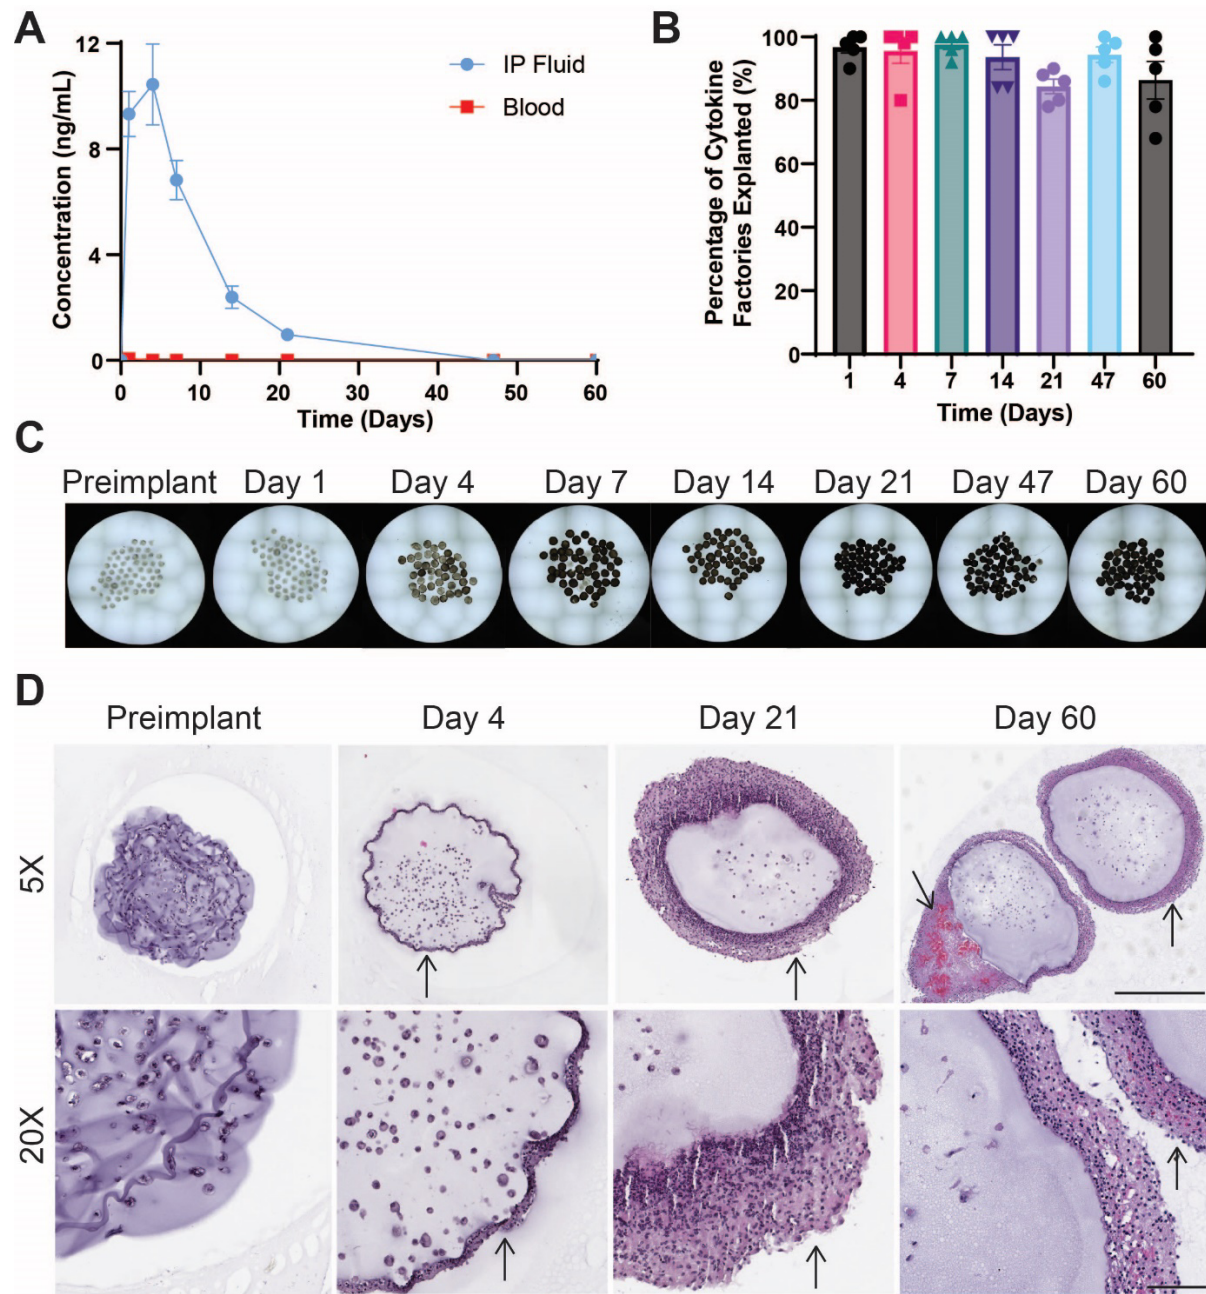

**Supplemental Figure 7. RPE-hIL2 Pharmacokinetics in immunocompetent mice.** **A**, In vivo hIL2 concentrations (ng/mL) in IP fluid and blood as a function of time with a fixed dose of 50 capsules (n=5 mice per group). Values plotted are mean +/- SEM. **B**, Percentage of retrieved capsules at various timepoints after administration (n=5 mice per group). **C**, Capsules collected from pharmacokinetic studies were imaged using brightfield microscopy (2x) to qualitatively monitor PFO of the alginate core-shell surface over time. Single field of view (2x) images with overlapping fields were stitched to create a mosaic. **D**, H&E staining of explanted capsules at various timepoints. Capsule sections shown at 5x and 20x magnification. Host immune cells accumulate on the surface of the capsules over time (black arrows).
