# Supplementary material for: Activation of Adaptive and Innate Immune Cells via Localized IL2 Cytokine Factories Eradicates Mesothelioma Tumors
Source: PubMed Central journal article supplement — Clin Cancer Res. 2022 Sep 12;28(23):5121–35. doi: 10.1158/1078-0432.CCR-22-1493 (PMC9713361; doi:10.1158/1078-0432.ccr-22-1493), 2022-09-12
Supplement: ccr-22-1493_figure_s8s9_suppfs8.pdf [file ccr-22-1493_figure_s8s9_suppfs8.pdf]

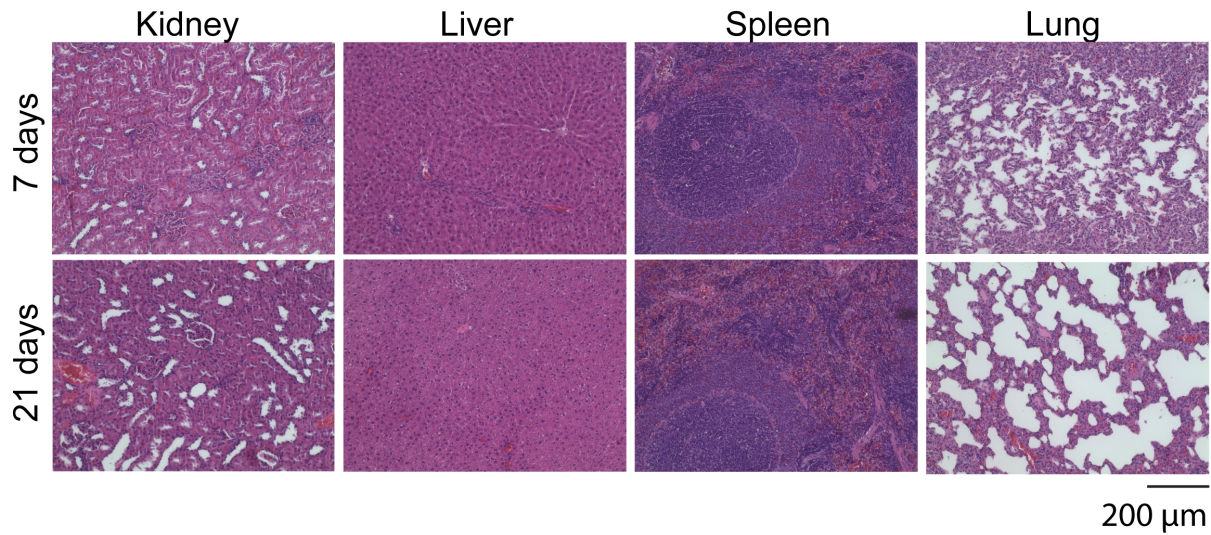

**Supplemental Figure 8. Toxicological analysis of RPE-hIL2 in the rat pleura.** Representative images of H&E-stained sections of the kidney, liver, spleen, and lungs of rats sacrificed at 7- and 21- days post capsule implant (n=5).

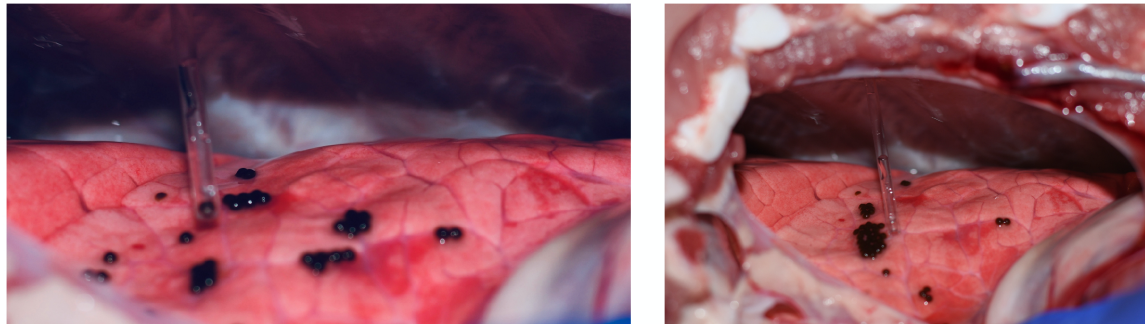

**Supplemental Figure 9. Safe and local delivery of capsules to the pleural space via catheter.** Macroscopic images of capsule administration to the lungs of a porcine cadaver.
