# Supplementary material for: Activation of Adaptive and Innate Immune Cells via Localized IL2 Cytokine Factories Eradicates Mesothelioma Tumors
Source: PubMed Central journal article supplement — Clin Cancer Res. 2022 Sep 12;28(23):5121–35. doi: 10.1158/1078-0432.CCR-22-1493 (PMC9713361; doi:10.1158/1078-0432.ccr-22-1493), 2022-09-12
Supplement: ccr-22-1493_supplementary_table_and_figure_legend_ms1_suppms1.pdf [file ccr-22-1493_supplementary_table_and_figure_legend_ms1_suppms1.pdf]

## **Activation of adaptive and innate immune cells via localized Interleukin-2 cytokine factories eradicates mesothelioma tumors**

Amanda M. Nash<sup>1,\*</sup>, Samira Aghlara-Fotovat<sup>1,\*</sup>, Bertha Castillo<sup>1</sup>, Andrea Hernandez<sup>1</sup>, Aarthi Pugazenthi<sup>2</sup>, Hyun-Sung Lee<sup>2</sup>, Hee-Jin Jang<sup>2</sup>, Annie Nguyen<sup>1</sup>, Alexander Lu<sup>1</sup>, Bryan M. Burt<sup>2</sup>, Ravi K. Ghanta<sup>2</sup>, and Omid Veisheh<sup>1,#</sup>

<sup>1</sup>Department of Bioengineering, Rice University, Houston, TX,

<sup>2</sup>Michael E. DeBakey Department of Surgery, Baylor College of Medicine, Houston, TX

\*These authors contributed equally

# **For Correspondence:** Omid Veisheh, 6500 Main St. Houston, Tx 77030, Tel.: +1 713 348 3082, email: [omid.veisheh@rice.edu](mailto:omid.veisheh@rice.edu)

Contents

**Supplemental Table 1. Mouse antibody panels for CyTOF (cytokines)..... 3**

**Supplemental Figure 1. Dose dependent anti-tumor effects of RPE-mIL2 administration..... 5**

**Supplemental Figure 2. CD8+ T cells are needed for a robust anti-tumor response in mice with MPM tumors ..... 6**

**Supplemental Figure 3. Combination treatment did not cause significant deviations in body weight. .... 7**

**Supplemental Figure 4. aPD-1 therapy is not effective as a single agent for MPM tumors..... 8**

**Supplemental Figure 5. Combination of RPE-mIL2 and aPD1 checkpoint therapy elicit MPM tumor eradication..... 9**

**Supplemental Figure 6. Gating strategies of CyTOF data. .... 10**

**Supplemental Figure 7. RPE-hIL2 Pharmacokinetics in immunocompetent mice. .... 11**

**Supplemental Figure 8. Toxicological analysis of RPE-hIL2 in the rat pleura..... 12**

**Supplemental Figure 9. Safe and local delivery of capsules to the pleural space via catheter..... 12**

**Supplemental Table 1. Mouse antibody panels for CyTOF (cytokines).**

| Label  | Cytokine           |            |              |              |
|--------|--------------------|------------|--------------|--------------|
|        | Target             | clone      | Source       | Cat. No      |
| 89Y    | CD45(Ms)           | 30-F11     | DVS-Fluidigm | 3089005B     |
| 111Cd  | CD44               | IM7        | Tonbo        | 70-0441-U100 |
| 115In  | CD4(Ms)            | RM4-5      | BioLegend    | 100506       |
| 127IdU | S-phase cell cycle |            |              |              |
| 139La  | CD11b              | M1/70      | BioLegend    | 101249       |
| 141Pr  | Ly-6G              | 1A8        | DVS-Fluidigm | 3141008B     |
| 142Nd  | CD11c              | Polyclonal | DVS-Fluidigm | 3142003B     |
| 143Nd  | IL-5               | TRFK5      | DVS-Fluidigm | 3143003B     |
| 144Nd  | IL-2               | JES6-5H4   | DVS-Fluidigm | 3144002B     |
| 145Nd  | CD69               | H1.2F3     | DVS-Fluidigm | 3145005B     |
| 146Nd  | CD8a (Ms)          | 53-6.7     | DVS-Fluidigm | 3146003B     |
| 147Sm  | CD103              | 2.00E+07   | BioLegend    | 121401       |
| 148Nd  | CD27               | LG.3A10    | BioLegend    | 124202       |
| 149Sm  | CD19 (Ms)          | 6D5        | DVS-Fluidigm | 3149002B     |
| 150Nd  | CD25               | 3C7        | BioLegend    | 101902       |
| 151Eu  | CD64               | X54-5/7.1  | DVS-Fluidigm | 3151012B     |
| 152Sm  | CD3e               | 145-2C11   | DVS-Fluidigm | 3152004B     |
| 153Eu  | CD274, PD-L1       | 10F.9G2    | DVS-Fluidigm | 3153016B     |
| 154Sm  | IFNa               | RMMA-1     | PBL          | 22100-1      |
| 155Gd  | CCR7               | 4B12       | eBioscience  | 16-1971-85   |
| 156Gd  | TCR beta           | H57-597    | BioLegend    | 109201       |
| 158Gd  | IL-10(Ms)          | JES5-16E3  | DVS-Fluidigm | 3158002B     |
| 159Tb  | IL-12              | C15.6      | BD           | 554477       |
| 160Gd  | CD62L              | MEL-14     | DVS-Fluidigm | 3160008B     |
| 161Dy  | CD40               | HM40-3     | DVS-Fluidigm | 3161020B     |
| 162Dy  | TNFa               | MP6-XT22   | DVS-Fluidigm | 3162002B     |
| 163Dy  | CD152, CTLA-4      | 9H10       | BioLegend    | 106202       |
| 164Dy  | LAP, TCF-beta      | TW7-16B4   | DVS-Fluidigm | 3164014B     |
| 165Ho  | IFNg               | XMG1.2     | DVS-Fluidigm | 3165003B     |
| 166Er  | IL-4               | 11B11      | DVS-Fluidigm | 3166003B     |
| 167Er  | IL-6               | MP5-20F3   | DVS-Fluidigm | 3167003B     |
| 168Er  | Ki67               | B56        | BD           | 556003       |
| 169Tm  | CD127              | A7R34      | Tonbo        | 70-1271-U100 |
| 170Er  | NK1.1              | PK136      | DVS-Fluidigm | 3170002B     |
| 171Yb  | PD-1               | 29F.1A12   | BioLegend    | 135202       |
| 172Yb  | CD86               | GL1        | DVS-Fluidigm | 3172016B     |
| 173Yb  | F4/80              | BM8        | BioLegend    | 123102       |
| 174Yb  | CD326 (Ms)         | G8.8       | BioLegend    | 118201       |
| 175Lu  | CD317              | 927        | BioLegend    | 127002       |

|              |                            |             |              |          |
|--------------|----------------------------|-------------|--------------|----------|
| <b>176Yb</b> | <b>B220, CD45R</b>         | RA3-6B2     | BioLegend    | 103202   |
| <b>191Ir</b> | <b>Ir DNA-intercalator</b> |             |              |          |
| <b>198Pt</b> | <b>Cell viability</b>      |             |              |          |
| <b>209Bi</b> | <b>I-A/I-E, MHC-II</b>     | M5/114.15.2 | DVS-Fluidigm | 3209006B |
